# Supplementary material for: Bacterial Community Dynamics Distinguish Poultry Compost from Dairy Compost and Non-Amended Soils Planted with Spinach
Source: MDPI journal article supplement (doi:10.3390/microorganisms8101601), 2020-10-18
Supplement: s1 [file s1]

**Table S1.** Enzymes tested and associated soil substrates, experimental substrates, and positive controls [16].

| Enzyme                                     | Organic Substrate (Target Nutrient) | Substrate Used                                       | Positive Control                        |
|--------------------------------------------|-------------------------------------|------------------------------------------------------|-----------------------------------------|
| $\beta$ -1,4-glucosidase (BG)              | Cellulose (Carbon)                  | 4-MUB- $\beta$ -D-glucoside (Sigma #M2133)           | 4-methylumbilliferyl (Sigma #M1381)     |
| Phosphatase (AP)                           | Phosphomonoesters (Phosphorous)     | 4-MUB-phosphate (Sigma #M8883)                       | 4-methylumbilliferyl (Sigma #M1381)     |
| $\beta$ -1,4-N-acetylglucosaminidase (NAG) | Chitin (Carbon and Nitrogen)        | 4-MUB-N-acetyl- $\beta$ -glucosaminide (Sigma #2133) | 4-methylumbilliferyl (Sigma #M1381)     |
| Leucine (LUC)                              | L-leucine aminopeptidase (Nitrogen) | L-leucine-7-amido-4-methylcoumarin (Sigma #L2145)    | 7-amido-4-methylcoumarin (Sigma #A9891) |
