# Supplementary material for: Bacterial Community Dynamics Distinguish Poultry Compost from Dairy Compost and Non-Amended Soils Planted with Spinach
Source: MDPI journal article supplement (doi:10.3390/microorganisms8101601), 2020-10-18
Supplement: s1 [file s1]

**Table S4.** Median percentage of sequences of the most abundant classified fungi by compost treatment: without compost (NoC), dairy manure compost (DMC), poultry litter compost (PLC)

| Phylum        | Class           | Order           | Family              | Genus                   | Species                          | NoC  | DMC  | PLC  |
|---------------|-----------------|-----------------|---------------------|-------------------------|----------------------------------|------|------|------|
| Zygomycota    | Incertae sedis  | Mortierellales  | Mortierellaceae     | <i>Mortierella</i>      | <i>elongata</i>                  | 3.95 | 3.28 | 9.56 |
| Zygomycota    | Incertae sedis  | Mortierellales  | Mortierellaceae     | <i>Mortierella</i>      | <i>rishiksha</i>                 | 5.45 | 3.40 | 4.92 |
| Zygomycota    | Incertae sedis  | Mortierellales  | Mortierellaceae     | <i>Mortierella</i>      |                                  | 4.42 | 4.34 | 4.79 |
| Ascomycota    | Pezizomycetes   | Pezizales       | Ascobolaceae        | <i>Ascobolus</i>        |                                  | 3.49 | 3.10 | 6.03 |
| Zygomycota    | Incertae sedis  | Mortierellales  | Mortierellaceae     | <i>Mortierella</i>      | <i>epicladia</i>                 | 4.08 | 4.00 | 3.74 |
| Ascomycota    | Pezizomycetes   | Pezizales       | Pyronemataceae      | <i>Pseudaleuria</i>     |                                  | 1.76 | 1.36 | 8.65 |
| Ascomycota    | Sordariomycetes | Microascales    | Microascaceae       | <i>Pseudallescheria</i> | <i>fimeti</i>                    | 3.29 | 3.22 | 2.29 |
| Zygomycota    | Incertae sedis  | Mortierellales  | Mortierellaceae     | <i>Mortierella</i>      | <i>exigua</i>                    | 2.92 | 2.68 | 3.14 |
| Ascomycota    | Sordariomycetes | Hypocreales     | Nectriaceae         | <i>Fusarium</i>         |                                  | 2.20 | 2.39 | 1.75 |
| Zygomycota    | Incertae sedis  | Mortierellales  | Mortierellaceae     | <i>Mortierella</i>      | <i>amoeboides</i>                | 1.35 | 1.45 | 1.03 |
| Ascomycota    | Dothideomycetes | Pleosporales    |                     |                         |                                  | 1.44 | 1.32 | 1.03 |
| Ascomycota    | Pezizomycetes   | Pezizales       | Pyronemataceae      |                         |                                  | 0.88 | 1.15 | 1.73 |
| Basidiomycota | Agaricomycetes  | Agaricales      | Bolbitiaceae        | <i>Conocybe</i>         | <i>apala</i>                     | 0.72 | 2.22 | 0.47 |
| Ascomycota    | Sordariomycetes | Hypocreales     | Nectriaceae         |                         |                                  | 1.17 | 1.18 | 0.87 |
| Basidiomycota | Agaricomycetes  | Cantharellales  | Ceratobasidiaceae   | <i>Ceratobasidium</i>   |                                  | 0.88 | 1.51 | 0.80 |
| Ascomycota    | Sordariomycetes | Sordariales     | Chaetomiaceae       | <i>Humicola</i>         | <i>grisea</i> var. <i>grisea</i> | 0.58 | 0.55 | 1.96 |
| Zygomycota    | Incertae sedis  | Mortierellales  | Mortierellaceae     | <i>Mortierella</i>      |                                  | 0.78 | 1.10 | 1.05 |
| Ascomycota    | Sordariomycetes | Sordariales     | Lasiochaetaceae     |                         |                                  | 0.57 | 0.72 | 1.25 |
| Zygomycota    | Incertae sedis  | Mortierellales  | Mortierellaceae     |                         |                                  | 0.39 | 0.46 | 1.57 |
| Ascomycota    | Dothideomycetes | Incertae sedis  | Pseudeurotiaceae    | <i>Pseudogymnoascus</i> | <i>roseus</i>                    | 0.98 | 0.65 | 0.51 |
| Ascomycota    | Eurotiomycetes  | Chaetothyriales | Herpotrichiellaceae | <i>Exophiala</i>        | <i>equi</i>                      | 0.93 | 0.73 | 0.48 |
| Ascomycota    | Dothideomycetes | Pleosporales    | Pleosporaceae       |                         |                                  | 0.72 | 0.87 | 0.49 |
| Ascomycota    | Eurotiomycetes  | Chaetothyriales | Chaetothyriaceae    | <i>Cyphellophora</i>    | <i>vermispora</i>                | 0.62 | 0.96 | 0.45 |
| Ascomycota    | Eurotiomycetes  | Onygeles        |                     |                         |                                  | 0.78 | 0.74 | 0.50 |
| Ascomycota    | Dothideomycetes | Pleosporales    |                     |                         | DWS12m2_2                        | 0.84 | 0.70 | 0.43 |
| Ascomycota    | Pezizomycetes   | Pezizales       | Ascobolaceae        |                         |                                  | 0.19 | 0.32 | 1.40 |
| Basidiomycota | Agaricomycetes  | Agaricales      | Marasmiaceae        | <i>Marasmius</i>        | <i>oreades</i>                   | 0.48 | 1.01 | 0.39 |
| Basidiomycota | Agaricomycetes  | Cantharellales  | Ceratobasidiaceae   |                         |                                  | 1.20 | 0.29 | 0.40 |
| Ascomycota    | Dothideomycetes | Pleosporales    | Pleosporaceae       | <i>Alterria</i>         |                                  | 0.61 | 0.59 | 0.51 |
| Basidiomycota | Agaricomycetes  | Corticiales     | Corticaceae         | <i>Waitea</i>           | <i>Rhizoctonia zeae</i>          | 0.46 | 0.50 | 0.59 |
| Basidiomycota | Tremellomycetes | Filobasidiales  | Filobasidiaceae     | <i>Cryptococcus</i>     | <i>terreus</i>                   | 0.58 | 0.47 | 0.47 |
| Basidiomycota | Agaricomycetes  | Agaricales      | Marasmiaceae        | <i>Marasmius</i>        |                                  | 0.83 | 0.45 | 0.22 |
| Basidiomycota | Agaricomycetes  | Cantharellales  | Ceratobasidiaceae   |                         |                                  | 0.72 | 0.35 | 0.40 |
| Ascomycota    | Dothideomycetes | Pleosporales    | Phaeosphaeriaceae   | <i>Phaeosphaeria</i>    |                                  | 0.39 | 0.75 | 0.31 |
| Zygomycota    | Incertae sedis  | Mortierellales  | Mortierellaceae     | <i>Mortierella</i>      | <i>antarctica</i>                | 0.53 | 0.66 | 0.25 |
| Ascomycota    | Sordariomycetes | Sordariales     | Chaetomiaceae       | <i>Chaetomium</i>       |                                  | 0.54 | 0.45 | 0.32 |
| Basidiomycota | Agaricomycetes  | Cantharellales  | Ceratobasidiaceae   | <i>Ceratobasidium</i>   |                                  | 0.47 | 0.43 | 0.35 |
| Ascomycota    | Dothideomycetes | Pleosporales    | Incertae sedis      | <i>Paraphoma</i>        |                                  | 0.40 | 0.57 | 0.28 |
| Ascomycota    | Sordariomycetes | Sordariales     | Lasiochaetaceae     |                         |                                  | 0.20 | 0.18 | 0.80 |
| Ascomycota    | Leotiomycetes   | Helotiales      | Hyaloscyphaceae     | <i>Cistella</i>         | KUS_F52527                       | 0.41 | 0.50 | 0.24 |
| Basidiomycota | Agaricomycetes  | Agaricales      | Strophariaceae      | <i>Agrocybe</i>         | <i>pediades</i>                  | 0.31 | 0.67 | 0.17 |
| Ascomycota    | Sordariomycetes | Sordariales     | Lasiochaetaceae     | <i>Podospora</i>        |                                  | 0.43 | 0.36 | 0.33 |
| Zygomycota    | Incertae sedis  | Mortierellales  | Mortierellaceae     | <i>Mortierella</i>      | <i>polygonia</i>                 | 0.40 | 0.37 | 0.34 |
| Basidiomycota | Agaricomycetes  | Agaricales      | Agaricaceae         | <i>Cyathus</i>          | <i>stercorius</i>                | 0.26 | 0.61 | 0.13 |
| Ascomycota    |                 |                 |                     |                         | sp 2 UFMGCB 5757                 | 0.55 | 0.30 | 0.13 |
| Ascomycota    | Sordariomycetes | Sordariales     | Chaetomiaceae       |                         |                                  | 0.22 | 0.21 | 0.53 |
| Basidiomycota | Agaricomycetes  | Cantharellales  | Hydceae             | <i>Sistotrema</i>       |                                  | 0.33 | 0.35 | 0.27 |
| Ascomycota    | Dothideomycetes |                 |                     |                         |                                  | 0.34 | 0.38 | 0.23 |
| Basidiomycota | Agaricomycetes  | Agaricales      | Psathyrellaceae     | <i>Coprinellus</i>      | <i>bisporus</i>                  | 0.01 | 0.92 | 0.00 |
| Ascomycota    | Dothideomycetes | Pleosporales    | Didymosphaeriaceae  | <i>Rousoella</i>        | <i>neopustulans</i>              | 0.30 | 0.34 | 0.26 |

|               |                 |                |                   |                      |                       |      |      |      |
|---------------|-----------------|----------------|-------------------|----------------------|-----------------------|------|------|------|
| Basidiomycota | Agaricomycetes  | Auriculariales |                   |                      |                       | 0.32 | 0.46 | 0.12 |
| Ascomycota    | Orbiliomycetes  | Orbiliales     | Orbiliaceae       | <i>Arthrobotrys</i>  | <i>oligospora</i>     | 0.43 | 0.28 | 0.16 |
| Ascomycota    | Dothideomycetes | Pleosporales   | Leptosphaeriaceae | <i>Leptosphaeria</i> | sp MH_2001            | 0.20 | 0.20 | 0.45 |
| Ascomycota    | Leotiomycetes   | Helotiales     |                   |                      |                       | 0.45 | 0.30 | 0.09 |
| Basidiomycota | Agaricomycetes  | Agaricales     | Entolomataceae    | <i>Entoloma</i>      | <i>perumbilicatum</i> | 0.43 | 0.28 | 0.13 |
| Ascomycota    |                 |                |                   |                      | sp FL_2010c           | 0.33 | 0.27 | 0.23 |
| Ascomycota    | Dothideomycetes | Pleosporales   | Phaeosphaeriaceae | <i>Phaeosphaeria</i> | sp TMS_2011           | 0.35 | 0.32 | 0.12 |
| Ascomycota    |                 |                |                   |                      | sp r433               | 0.28 | 0.25 | 0.24 |
| Zygomycota    | Incertae sedis  | Incertae sedis | Incertae sedis    | <i>Modicella</i>     | <i>reniformis</i>     | 0.19 | 0.39 | 0.19 |
| Ascomycota    | Sordariomycetes | Sordariales    | Lasiosphaeriaceae | <i>Podospora</i>     | sp 84_110A            | 0.24 | 0.34 | 0.18 |
