# Supplementary material for: Bacterial Community Dynamics Distinguish Poultry Compost from Dairy Compost and Non-Amended Soils Planted with Spinach
Source: MDPI journal article supplement (doi:10.3390/microorganisms8101601), 2020-10-18
Supplement: s1 [file s1]

**Table S2** Candidate 16S taxa that distinguish treatment differences identified through principal response curves (PRC). Results for both fields combined and each field separately are tallied by OTU number. Taxa highlighted in yellow are those chosen for representation in Table 4.

| OTU<br>number | Lilac<br>alone<br>top 25 | Lilac<br>alone<br>top 50 | Wheelock<br>alone<br>top 25 | Wheelock<br>alone<br>top 50 | Fields<br>combined<br>top 25 | Fields<br>combined<br>top 50 |
|---------------|--------------------------|--------------------------|-----------------------------|-----------------------------|------------------------------|------------------------------|
| 33            |                          | x                        |                             |                             |                              |                              |
| 113           |                          |                          | x                           | x                           |                              |                              |
| 118           | x                        | x                        |                             |                             |                              |                              |
| 177           |                          |                          | x                           | x                           | x                            | x                            |
| 185           |                          |                          |                             |                             | x                            | x                            |
| 195           |                          | x                        |                             |                             |                              |                              |
| 216           |                          | x                        | x                           | x                           | x                            | x                            |
| 227           |                          |                          |                             | x                           |                              | x                            |
| 252           |                          |                          | x                           |                             |                              | x                            |
| 255           | x                        | x                        | x                           | x                           |                              | x                            |
| 255           | x                        |                          |                             |                             |                              |                              |
| 262           | x                        | x                        | x                           | x                           | x                            | x                            |
| 266           |                          |                          | x                           | x                           | x                            | x                            |
| 278           |                          |                          | x                           | x                           |                              |                              |
| 284           | x                        | x                        |                             |                             |                              |                              |
| 300           | x                        |                          |                             |                             |                              | x                            |
| 326           | x                        | x                        |                             | x                           |                              | x                            |
| 343           |                          |                          |                             |                             |                              | x                            |
| 359           |                          |                          | x                           | x                           |                              | x                            |
| 371           |                          |                          |                             | x                           |                              | x                            |
| 415           |                          | x                        | x                           | x                           | x                            | x                            |
| 445           |                          |                          |                             |                             | x                            |                              |
| 445           |                          |                          |                             |                             |                              | x                            |
| 471           |                          |                          |                             |                             | x                            |                              |
| 471           |                          |                          |                             |                             |                              | x                            |
| 482           |                          |                          |                             |                             |                              | x                            |
| 497           |                          |                          |                             |                             |                              | x                            |
| 527           |                          |                          | x                           | x                           | x                            | x                            |
| 532           |                          |                          |                             |                             |                              | x                            |
| 542           |                          |                          |                             |                             |                              | x                            |
| 649           | x                        | x                        | x                           | x                           | x                            | x                            |
| 656           |                          |                          | x                           | x                           | x                            | x                            |

|       |   |   |   |   |   |   |
|-------|---|---|---|---|---|---|
| 661   |   |   |   |   |   | x |
| 698   | x | x |   |   |   |   |
| 701   |   |   |   |   |   | x |
| 751   |   | x |   |   |   |   |
| 754   |   |   |   |   |   | x |
| 768   |   |   | x |   |   |   |
| 1036  |   |   | x | x |   | x |
| 1154  |   |   |   |   |   | x |
| 1238  |   |   |   |   |   | x |
| 1363  |   |   |   |   |   | x |
| 1543  |   |   |   |   |   | x |
| 2083  |   |   |   |   |   | x |
| 2536  |   |   |   |   |   | x |
| 2700  |   |   | x |   |   | x |
| 2798  |   |   |   |   |   | x |
| 2858  | x |   |   |   |   |   |
| 4585  | x | x |   |   |   |   |
| 5358  | x | x | x |   | x | x |
| 6392  |   |   |   |   |   | x |
| 7799  |   |   |   |   |   | x |
| 7864  |   |   | x |   |   |   |
| 10109 |   |   |   |   |   | x |
| 10751 |   |   |   |   |   | x |
| 14533 | x | x |   |   |   |   |
| 15573 |   |   |   | x |   |   |
| 15638 | x | x |   |   |   |   |
| 19282 |   |   |   |   |   | x |
| 25209 | x | x | x | x |   |   |
| 25388 |   |   |   |   |   | x |
| 25942 |   |   |   |   |   | x |
| 29153 | x | x |   |   |   |   |
| 31579 |   |   |   |   | x | x |
| 33438 | x | x |   |   |   | x |
| 34099 | x | x |   | x |   | x |
| 34390 | x | x |   |   |   |   |
| 35281 |   |   |   |   |   | x |
| 35458 | x | x |   |   |   | x |
