# Supplementary material for: Bacterial Community Dynamics Distinguish Poultry Compost from Dairy Compost and Non-Amended Soils Planted with Spinach
Source: MDPI journal article supplement (doi:10.3390/microorganisms8101601), 2020-10-18
Supplement: s1 [file s1]

**Table S3.** Median percentage of sequences of the most abundant classified bacteria/archaea by compost treatment: without compost (NoC), dairy manure compost (DMC), poultry litter compost (PLC)

| Kingdom  | Phylum           | Class                | Order                | Family                | Genus                            | NoC  | DMC  | PLC  |
|----------|------------------|----------------------|----------------------|-----------------------|----------------------------------|------|------|------|
| Bacteria | Acidobacteria    | Acidobacteria-6      | iii1-15              |                       |                                  | 6.88 | 6.81 | 6.77 |
| Bacteria | Verrucomicrobia  | [Spartobacteria]     | [Chthoniobacterales] | [Chthoniobacteraceae] | DA101                            | 2.83 | 2.53 | 2.61 |
| Bacteria | Acidobacteria    | [Chloracidobacteria] | RB41                 |                       |                                  | 2.46 | 2.42 | 2.22 |
| Bacteria | Bacteroidetes    | [Saprospirae]        | [Saprospirales]      | Chitinophagaceae      |                                  | 1.68 | 1.71 | 1.56 |
| Bacteria | Acidobacteria    | [Chloracidobacteria] | RB41                 | Ellin6075             |                                  | 1.44 | 1.52 | 1.45 |
| Bacteria | Proteobacteria   | Gammaproteobacteria  | Xanthomonadales      | Sinobacteraceae       |                                  | 1.38 | 1.47 | 1.30 |
| Bacteria | Gemmatimonadetes | Gemm-1               |                      |                       |                                  | 1.25 | 1.33 | 1.19 |
| Archaea  | Crenarchaeota    | Thaumarchaeota       | Nitrososphaerales    | Nitrososphaeraceae    | <i>candidatus Nitrososphaera</i> | 1.29 | 1.26 | 0.93 |
| Bacteria | Nitrospirae      | Nitrospira           | Nitrospirales        | Nitrospiraceae        | <i>Nitrospira</i>                | 1.16 | 1.13 | 1.01 |
| Bacteria | Proteobacteria   | Alphaproteobacteria  | Sphingomonadales     | Sphingomonadaceae     | <i>Kaistobacter</i>              | 0.97 | 1.04 | 1.21 |
| Bacteria | Proteobacteria   | Deltaproteobacteria  | Syntrophobacterales  | Syntrophobacteraceae  |                                  | 0.86 | 0.86 | 0.80 |
| Bacteria | Proteobacteria   | Alphaproteobacteria  | Rhizobiales          | Hyphomicrobiaceae     | <i>Rhodoplanes</i>               | 0.83 | 0.80 | 0.77 |
| Bacteria | Proteobacteria   | Gammaproteobacteria  | Xanthomonadales      | Sinobacteraceae       | <i>Steroidobacter</i>            | 0.75 | 0.71 | 0.72 |
| Bacteria | Proteobacteria   | Betaproteobacteria   | MND1                 |                       |                                  | 0.74 | 0.78 | 0.66 |
| Bacteria | Proteobacteria   | Betaproteobacteria   | IS-44                |                       |                                  | 0.52 | 0.53 | 0.51 |
| Bacteria | Acidobacteria    | Acidobacteriia       | Acidobacteriales     | Koribacteraceae       |                                  | 0.51 | 0.51 | 0.45 |
| Bacteria | Proteobacteria   | Alphaproteobacteria  | Rhizobiales          | Bradyrhizobiaceae     | <i>Bradyrhizobium</i>            | 0.51 | 0.49 | 0.48 |
| Bacteria | Gemmatimonadetes | Gemmatimonadetes     | N1423WL              |                       |                                  | 0.49 | 0.49 | 0.41 |
| Bacteria | Nitrospirae      | Nitrospira           | Nitrospirales        | 0319-6A21             |                                  | 0.47 | 0.49 | 0.41 |
| Bacteria | Proteobacteria   | Alphaproteobacteria  | Rhizobiales          | Hyphomicrobiaceae     | <i>Hyphomicrobium</i>            | 0.40 | 0.37 | 0.37 |
| Bacteria | Proteobacteria   | Gammaproteobacteria  | Pseudomonadales      | Pseudomonadaceae      | <i>Pseudomonas</i>               | 0.38 | 0.32 | 0.43 |
| Bacteria | Proteobacteria   | Betaproteobacteria   | Ellin6067            |                       |                                  | 0.37 | 0.36 | 0.32 |
| Bacteria | Proteobacteria   | Betaproteobacteria   | Burkholderiales      | Oxalobacteraceae      | <i>Janthinobacterium</i>         | 0.31 | 0.32 | 0.41 |
| Bacteria | Proteobacteria   | Gammaproteobacteria  | Thiotrichales        | Piscirickettsiaceae   |                                  | 0.27 | 0.32 | 0.30 |
| Bacteria | Verrucomicrobia  | [Pedosphaerae]       | [Pedosphaerales]     | auto67_4W             |                                  | 0.28 | 0.28 | 0.30 |
| Bacteria | Proteobacteria   | Alphaproteobacteria  | Rhizobiales          |                       |                                  | 0.29 | 0.28 | 0.27 |
| Bacteria | Proteobacteria   | Betaproteobacteria   |                      |                       |                                  | 0.25 | 0.30 | 0.28 |
| Bacteria | Proteobacteria   | Deltaproteobacteria  | Myxococcales         | Haliangiaceae         |                                  | 0.30 | 0.25 | 0.25 |
| Bacteria | Proteobacteria   | Alphaproteobacteria  | Rhodospirillales     | Rhodospirillaceae     |                                  | 0.27 | 0.27 | 0.26 |
| Bacteria | Acidobacteria    | S035                 |                      |                       |                                  | 0.28 | 0.28 | 0.22 |
| Bacteria | Proteobacteria   | Alphaproteobacteria  | Sphingomonadales     | Sphingomonadaceae     |                                  | 0.26 | 0.25 | 0.26 |
| Bacteria | Planctomycetes   | Phycisphaerae        | WD2101               |                       |                                  | 0.25 | 0.23 | 0.24 |
| Bacteria | Verrucomicrobia  | Opitutae             | Opitutaes            | Opitutaceae           | <i>Opitutus</i>                  | 0.20 | 0.23 | 0.23 |
| Bacteria | Bacteroidetes    | Cytophagia           | Cytophagales         | Cytophagaceae         | <i>Adhaeribacter</i>             | 0.14 | 0.19 | 0.32 |
| Bacteria | Bacteroidetes    | Cytophagia           | Cytophagales         | Cytophagaceae         |                                  | 0.21 | 0.20 | 0.21 |
| Bacteria | Proteobacteria   | Betaproteobacteria   | A21b                 | EB1003                |                                  | 0.21 | 0.21 | 0.18 |
| Archaea  | Crenarchaeota    | Thaumarchaeota       | Nitrososphaerales    | Nitrososphaeraceae    | <i>candidatus Nitrososphaera</i> | 0.22 | 0.22 | 0.15 |
| Bacteria | Proteobacteria   | Deltaproteobacteria  | Myxococcales         |                       |                                  | 0.21 | 0.21 | 0.17 |
| Bacteria | Proteobacteria   | Alphaproteobacteria  | Rhodobacterales      | Hyphomonadaceae       |                                  | 0.19 | 0.18 | 0.21 |
| Bacteria | Bacteroidetes    | [Saprospirae]        | [Saprospirales]      | Chitinophagaceae      | <i>Niabella</i>                  | 0.18 | 0.20 | 0.18 |
| Bacteria | Bacteroidetes    | [Saprospirae]        | [Saprospirales]      | Chitinophagaceae      | <i>Flavisolibacter</i>           | 0.16 | 0.19 | 0.19 |
| Bacteria | Acidobacteria    | Acidobacteria-6      | iii1-15              | mb2424                |                                  | 0.18 | 0.16 | 0.19 |
| Bacteria | Acidobacteria    | [Chloracidobacteria] | 11-24                |                       |                                  | 0.18 | 0.18 | 0.16 |
| Bacteria | Proteobacteria   | Betaproteobacteria   | Burkholderiales      | Comamonadaceae        | <i>Methylibium</i>               | 0.18 | 0.18 | 0.16 |
| Bacteria | Proteobacteria   | Betaproteobacteria   | SC-I-84              |                       |                                  | 0.16 | 0.18 | 0.16 |
| Bacteria | Chloroflexi      | Ellin6529            |                      |                       |                                  | 0.18 | 0.17 | 0.14 |
| Bacteria | Firmicutes       | Bacilli              | Bacillales           |                       |                                  | 0.18 | 0.15 | 0.16 |
